# Supplementary material
Source: PubMed Central journal article supplement (PMC3587702)
Supplement: cr2012158x4.pdf [file cr2012158x4.pdf]

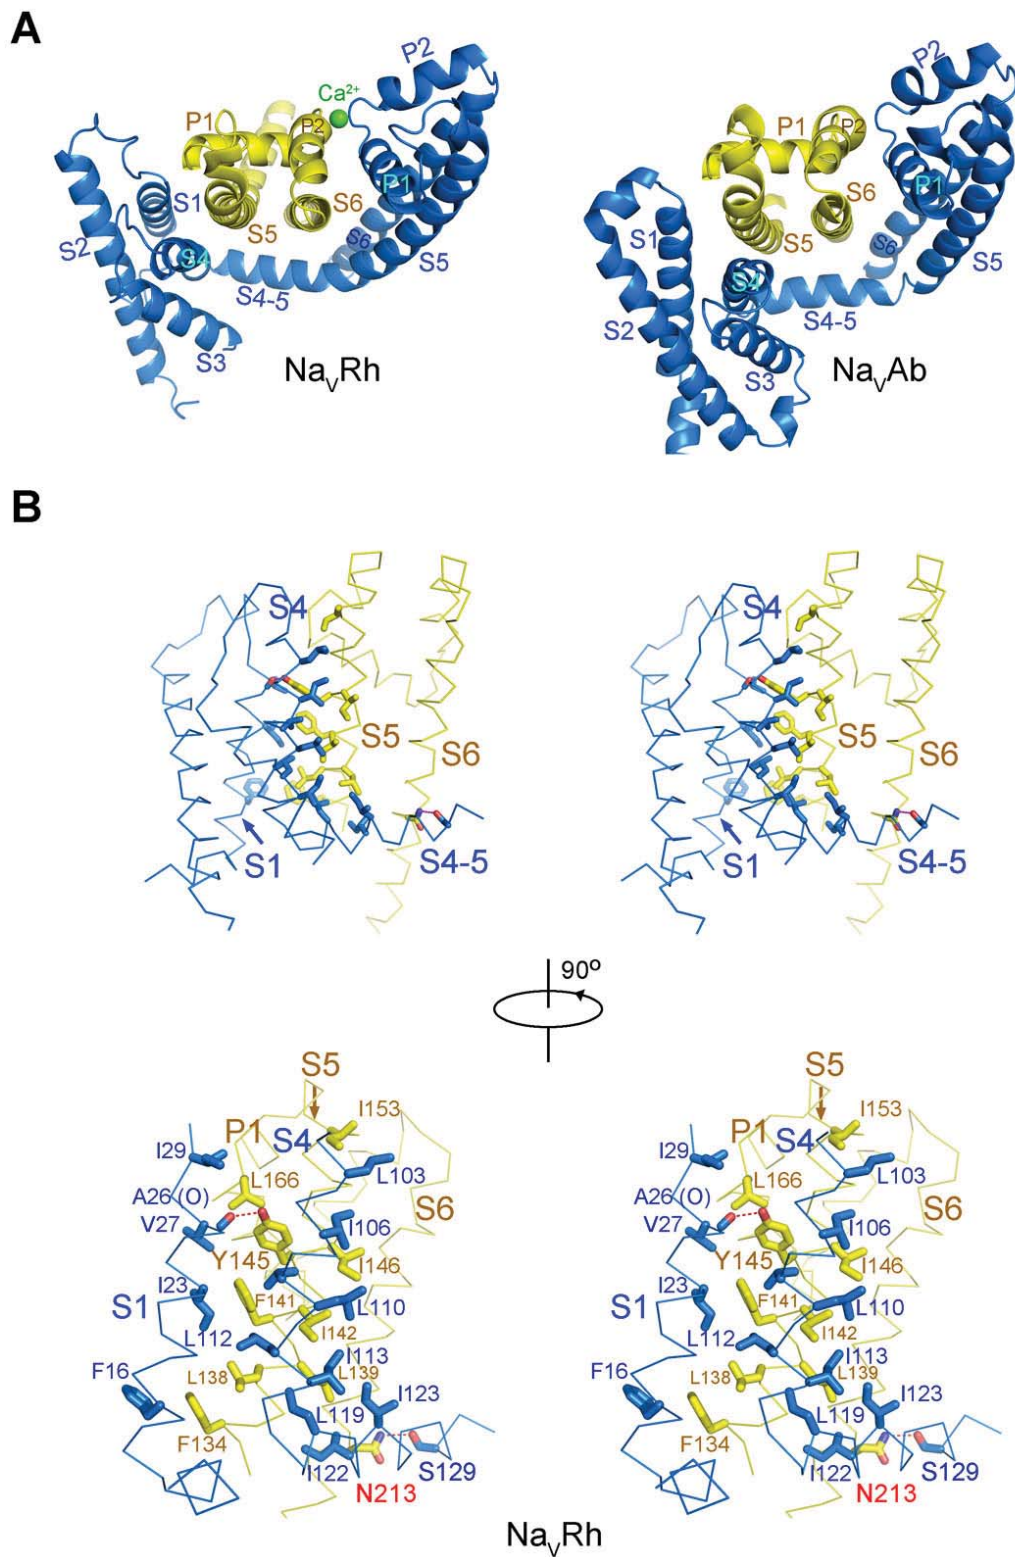

**Figure S4.** The VSD of Na<sub>v</sub>Rh contacts the pore domain more extensively than that of Na<sub>v</sub>Ab. (A) The S1 segment in Na<sub>v</sub>Rh, but not in Na<sub>v</sub>Ab, interacts extensively with

the S5 segment in the adjacent protomer. One complete protomer (blue) and the pore forming helix bundle from the adjacent protomer (yellow) are shown for Na<sub>v</sub>Rh (*left panel*) and Na<sub>v</sub>Ab (*right panel*) in the periplasmic view. The same colors are applied to the corresponding protomers in the two channels. **(B)** The interactions between a VSD and the pore forming helices of the adjacent protomer in Na<sub>v</sub>Rh. Stereoviews of two perpendicular views are shown. The H-bonds are indicated by red dashed lines. Asn213, which is an invariant residue in a number of voltage-gated ion channels, is highlighted in red.
