# Supplementary material
Source: PubMed Central journal article supplement (PMC3587702)
Supplement: cr2012158x6.pdf [file cr2012158x6.pdf]

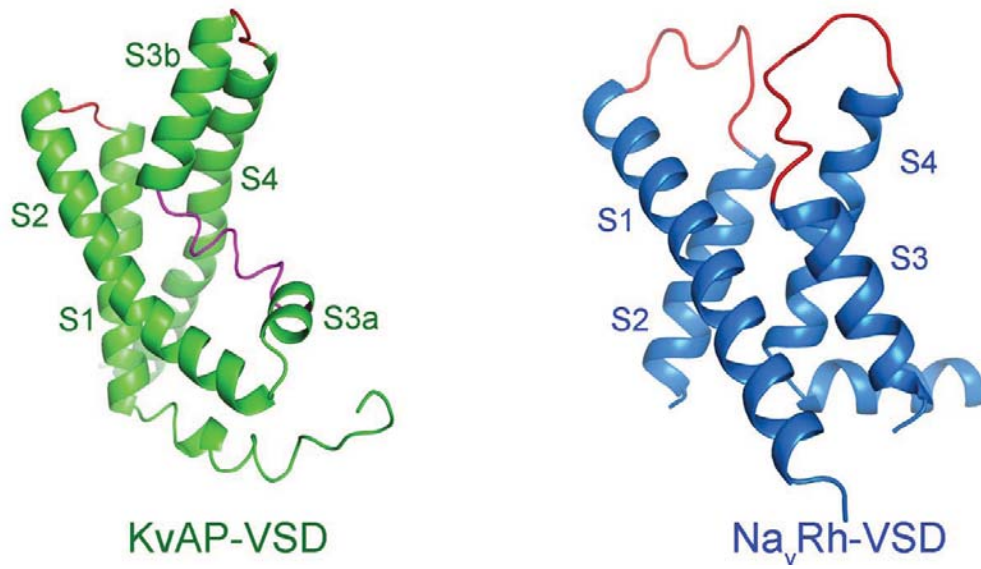

**Figure S6.** The distinct structural features of VSDs between KvAP and Na<sub>v</sub>Rh. KvAP contains an extended unwound region in the middle of the S3 segment. In contrast, flexible linkers exist between S1 and S2, S3 and S4 respectively in Na<sub>v</sub>Rh.
